# Supplementary material for: Modulation of Gut Microbial Community and Metabolism by Bacillus licheniformis HD173 Promotes the Growth of Nursery Piglets Model
Source: MDPI journal article supplement (doi:10.3390/nu16101497), 2024-05-15
Supplement: s1 [file s1]

**Table S1** Composition and nutrient levels of the basal diet(air-dry basis)

| Items                       | Content |
|-----------------------------|---------|
| Ingredients                 |         |
| Corn                        | 60%     |
| Wheat                       | 10%     |
| barley                      | 5%      |
| Soybean meal                | 18%     |
| Fermented soybean meal      | 3%      |
| Soybean oil                 | 0.50%   |
| Premix                      | 4%      |
| Total                       | 100%    |
| Nutrient levels             |         |
| Digestible Energy / (MJ/Kg) | 10.04   |
| Crude Protein               | 16.50%  |
| Digestive lysine            | 1.10%   |

**Table S2** Body weight and ADG of three groups in nursery piglets

| Item                   | Control        | 0.02% BL       | 0.04% BL       |
|------------------------|----------------|----------------|----------------|
| Body weight at 0d (kg) | 8.7 ± 0.15     | 8.8 ± 0.13     | 8.8 ± 0.12     |
| Body weight at 14d(kg) | 13.1 ± 0.20    | 13.7 ± 0.19    | 13.6 ± 0.24    |
| Body weight at 28d(kg) | 17.7 ± 0.33    | 18.9 ± 0.31    | 18.5 ± 0.40    |
| 0d to 14d ADG (g/day)  | 311.90 ± 5.14  | 349.21 ± 7.51  | 343.25 ± 10.60 |
| 15d to 28d ADG (g/day) | 328.17 ± 10.87 | 373.81 ± 11.43 | 348.41 ± 12.25 |
| 0d to 28d ADG (g/day)  | 320.04 ± 7.90  | 361.51 ± 9.16  | 345.83 ± 11.32 |

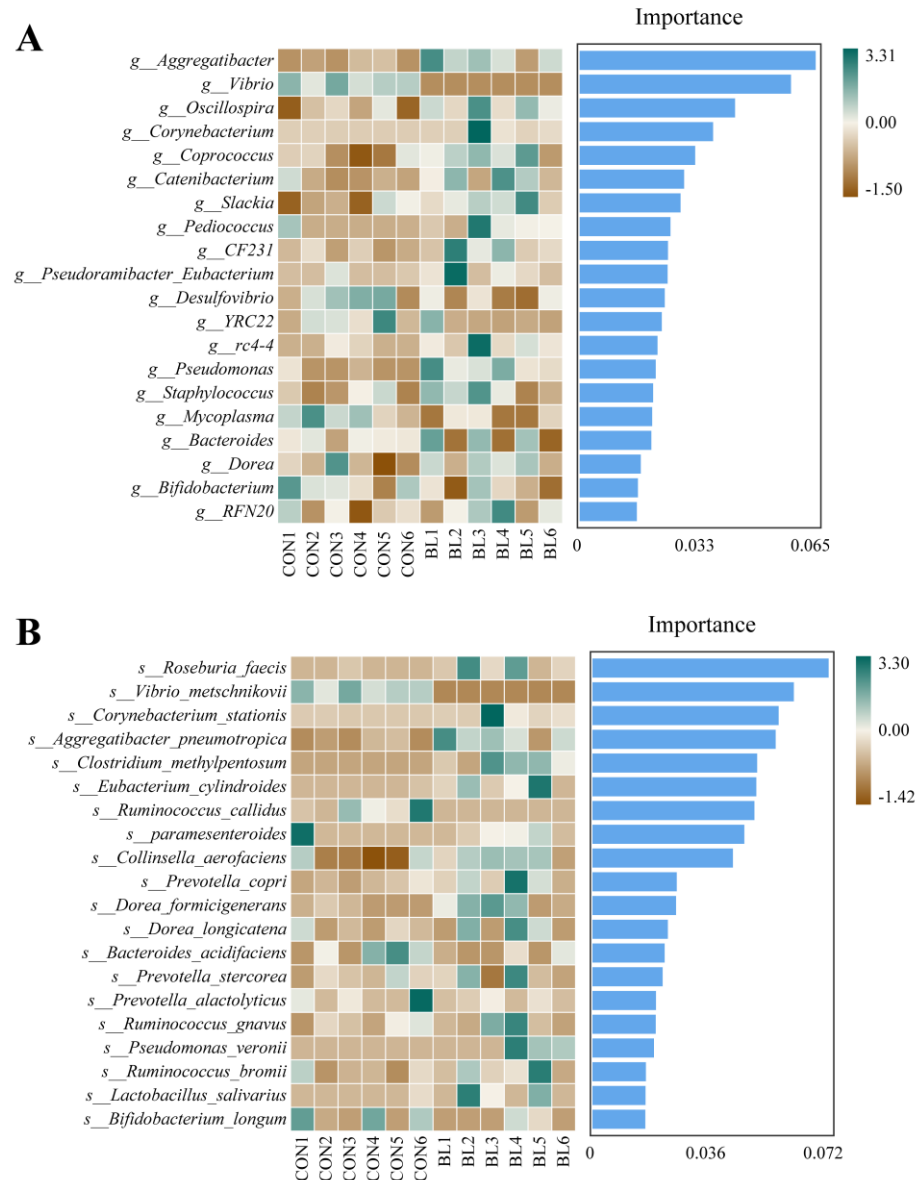

**Figure S1.** Random forest analysis of the relative abundance at the genus and species level. **(A)** the 20 genera with the highest level of importance; **(B)** the 20 species with the highest level of importance. n = 6.

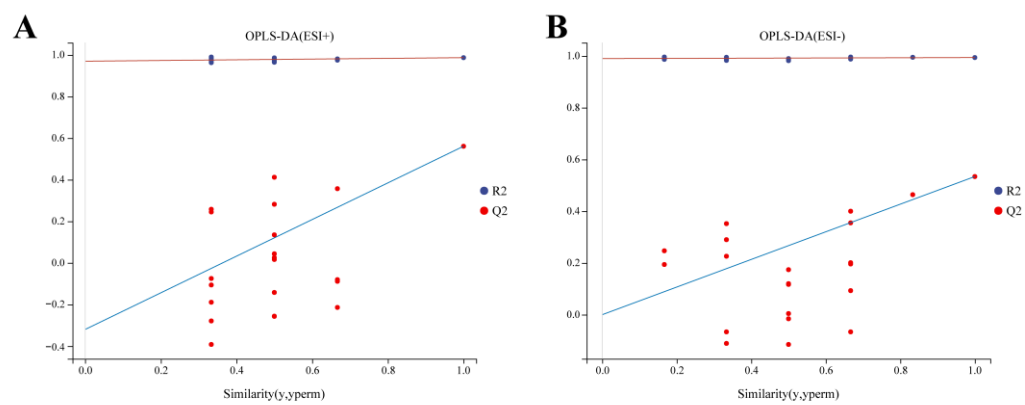

**Figure S2.** Permutation test of the OPLS-DA model. (A)ESI+; (B)ESI-. n = 6.
